# Supplementary material for: The Three Two-Pore Channel Subtypes from Rabbit Exhibit Distinct Sensitivity to Phosphoinositides, Voltage, and Extracytosolic pH
Source: MDPI journal article supplement (doi:10.3390/cells11132006), 2022-06-23
Supplement: s1 [file s1]

Supplementary figures and table for

# The three two-pore channel subtypes from rabbit exhibit distinct sensitivity to phosphoinositides, voltage, and extracytosolic pH

Xinghua Feng, Jian Xiong, Weijie Cai, Jin-Bin Tian, Michael X. Zhu

**Supplementary Table S1. Primers used for reverse transcription (RT) and PCR cloning of rabbit *TPCN1* and *TPCN2* cDNA**

| Gene name    | Primer                                                 |
|--------------|--------------------------------------------------------|
| <i>TPCN1</i> | RT: 5'-GCCCTGGTCTCACGCTC-3'                            |
|              | Sense: 5'-TACCGGACTCAGATCTATGGCCGTGAGTCTCGACG-3'       |
|              | Antisense: 5'-CTTGAGCTCGAGATCTGGGGTGACGGTCTGGGCGC-3'   |
| <i>TPCN2</i> | RT: 5'-CGAGTGGCGGTCAAAGGC-3'                           |
|              | Sense: 5'-TACCGGACTCAGATCTATGGCGGAGCCCCAGGC-3'         |
|              | Antisense: 5'-CTTGAGCTCGAGATCTGGCCTGCACAGTGGCAGGTGC-3' |

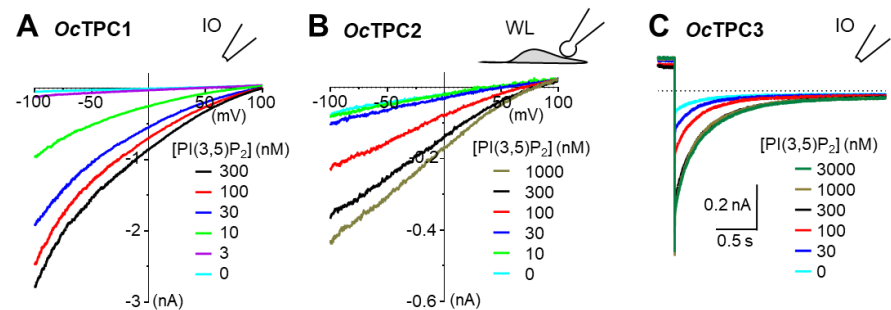

**Supplementary Figure S1. Concentration dependence on PI(3,5)P<sub>2</sub> of rabbit TPC1, TPC2, and TPC3 - related to Figure 2D.** HEK293 cells were transiently transfected with cDNA coding for OcTPC1-EGFP (A), OcTPC2-EGFP (B), and OcTPC3-EGFP (C). (A, B) Representative current-voltage (I-V) curves obtained from voltage ramps for OcTPC1 in inside-out (IO) and OcTPC2 in whole-endolysosome (WL) patches exposed to increasing concentrations of PI(3,5)P<sub>2</sub> as indicated. (C) Representative current traces of OcTPC3 in an IO patch exposed to increasing concentrations of PI(3,5)P<sub>2</sub> as indicated. The voltage was stepped from the holding potential at 0 mV to +100 mV for 4 s before returning to 0 mV again. Dashed line indicates zero current. For clarity, only the last 0.2 s of the +100-mV step and the tail at 0 mV are shown. Summary data are shown in Fig. 2D.

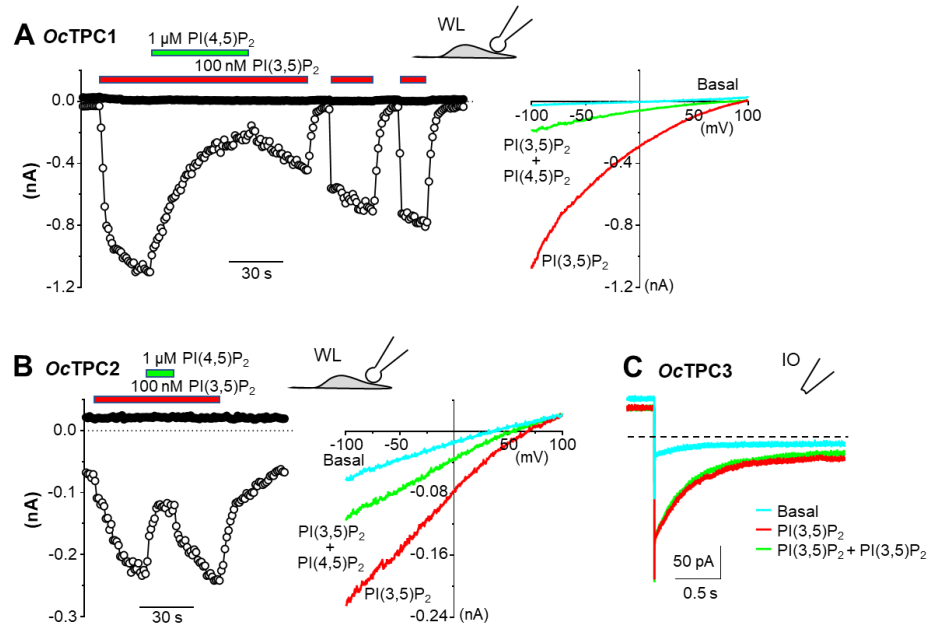

**Supplementary Figure S2. PI(4,5) $\text{P}_2$  inhibits rabbit TPC1 and TPC2, but not TPC3 - related to Figure 3E.** (A, B) Representative time courses of currents at +100 mV (filled circles) and -100 mV (open circles) recorded using voltage-ramps for whole-endolysosome (WL) patches isolated from HEK293 cells that expressed OcTPC1-EGFP (A) and OcTPC2-EGFP (B). The patches were exposed to 100 nM PI(3,5) $\text{P}_2$  and 1  $\mu\text{M}$  PI(4,5) $\text{P}_2$  as indicated by the horizontal bars. I-V curves obtained from voltage ramps at basal (cyan), in the presence of PI(3,5) $\text{P}_2$  alone (red), and in the presence of both PI(3,5) $\text{P}_2$  and PI(4,5) $\text{P}_2$  (green) are shown to the right of the time course traces. (C) Representative current traces detected in an inside-out (IO) patch excised from an HEK293 cell that expressed OcTPC3-EGFP, when the patch was unstimulated (basal, cyan), exposed to 100 nM PI(3,5) $\text{P}_2$  (red), and exposed to 100 nM PI(3,5) $\text{P}_2$  plus 1  $\mu\text{M}$  PI(4,5) $\text{P}_2$  (green). The voltage was stepped from the holding potential at 0 mV to +100 mV for 4 s before returning to 0 mV again. Dashed line indicates zero current. For clarity, only the last 0.3 s of the +100-mV step and the tail at 0 mV are shown. Summary data are shown in Fig. 3E.
